# Supplementary material for: Utilization of cardiovascular magnetic resonance (CMR) imaging for resumption of athletic activities following COVID-19 infection: an expert consensus document on behalf of the American Heart Association Council on Cardiovascular Radiology and Intervention (CVRI) Leadership and endorsed by the Society for Cardiovascular Magnetic Resonance (SCMR)
Source: Springer Nature journal article supplement (doi:10.1186/s12968-022-00907-8), 2022-01-01
Supplement: MOESM1 [file 23849858]

**SUPPLEMENTAL MATERIAL**

| First Author (Year)     | Pubmed PMID | N cases | Median or Mean Age | Post Covid Interval | CMR Tesla | LGE Pulse Seq.            | LGE Analysis                  | Prev. of LGE [%]                   | Prev. of Ischemic Pattern LGE | Prev. of Non-Ischemic & Pericardial Pattern LGE | T1 Mapping Pulse Seq.              | Location & native T1 Cutoff [ms]                                 | Prev. of Abnormal Native T1 [%]   | ECV Cutoff [%]                                        | Prev. of Abnormal ECV [%]      | T2 Pulse Seq.            | Location & T2 Cutoff [ms]                  | Prev. of Abnormal T2 [%]           |
|-------------------------|-------------|---------|--------------------|---------------------|-----------|---------------------------|-------------------------------|------------------------------------|-------------------------------|-------------------------------------------------|------------------------------------|------------------------------------------------------------------|-----------------------------------|-------------------------------------------------------|--------------------------------|--------------------------|--------------------------------------------|------------------------------------|
| Breitbart <sup>86</sup> | 34448040    | 56      | Ulloa 45.7         | 71d                 | 1.5T      | PSIR GRE                  | ND                            | 12%                                | ~1%                           | 11%                                             | MOLLI                              | basal T1 > 1077; mid T1 > 1083; apical T1 > 1081                 | 0.4% (of all evaluable segments)  | ND                                                    | ND (mean ECV 27.5 ± 3.4 %)     |                          | basal T2 > 50; mid T2 > 51; apical T2 > 53 | 2% (of all evaluable segments)     |
| Bustin <sup>72</sup>    | 34600236    | 20      | 46                 | 54d                 | 1.5T      | high-resolution 3D IR-GRE | visual grading                | 65%                                | 20%                           | 45%                                             | ND                                 | ND                                                               | ND (T1 = 1028 ± 59 ms)            | ND                                                    | ND (mean ECV 24.6 ± 2.5 %)     | ND                       | ND                                         | ND (T2 = 49±4 ms)                  |
| Cassar <sup>93</sup>    | 34693230    | 58      | 55                 | 6m                  | 3T        | PSIR GRE                  | visual and quantitative (SSD) | 23%                                | 0%                            | 23%                                             | ShMOLLI 5(1)3(1)1                  | basal T1 > 1197; mid T1 > 1215; apical T1 > 1275                 | basal: 9%; mid: 2%; apical: 2%    | basal: > 35%; mid > 36%; apical: > 38%                | basal: 6%; mid: 0%; apical: 0% | T2-prep SSFP             | basal: > 46; mid > 46; apical: > 56        | basal: 2%; mid: 2%; apical: 4%     |
| Clark <sup>87</sup>     | 34620179    | 50      | 27                 | 71d                 | 1.5T      | PSIR GRE                  | visual                        | 23%                                | 0%                            | 22.50%                                          | MOLLI Pre: 5(3s)3; Post: 4(1)3(1)2 | 97.5% in controls: basal T1 = 999; mid T1 = 987; apical T1 = 988 | ND                                | 97.5% in controls: basal = 25%; mid 23%; apical = 23% | NS                             | T2-prep SSFP             | 97.5% in controls: 46 ms                   | NS                                 |
| Galea <sup>84</sup>     | 34107985    | 27      | 54                 | 20d                 | 1.5T      | IR TFE                    | visual and quantitative (SSD) | 44%                                | 33%                           | 11%                                             | MOLLI                              | T1>1027                                                          | 41%                               | ECV>29.5%                                             | 43%                            | T2-prep SSFP             | global T2>49.9                             | 52%                                |
| Huang <sup>48</sup>     | 32763118    | 26      | 39                 | 38 d                | 3T        | ND                        | visual and quantitative (SSD) | 58% with LGE and/or T2 abnormality | ND                            | 31%                                             | ND                                 | ND                                                               | ND (median T1 = 1271 vs. 1237 ms) | ND (ECV = 28.2%)                                      |                                | T2-prep single-shot SSFP | ND (median T2 = 42.7 vs. 38.1)             | 58% with LGE and/or T2 abnormality |

**SUPPLEMENTAL MATERIAL**

| First Author (Year)    | Pubmed PMID | N cases | Median or Mean Age | Post Covid Interval | CMR Tesla | LGE Pulse Seq. | LGE Analysis                  | Prev. of LGE [%] | Prev. of Ischemic Pattern LGE | Prev. of Non-Ischemic & Pericardial Pattern LGE | T1 Mapping Pulse Seq.                         | Location & native T1 Cutoff [ms] | Prev. of Abnormal Native T1 [%]              | ECV Cutoff [%] | Prev. of Abnormal ECV [%] | T2 Pulse Seq.            | Location & T2 Cutoff [ms] | Prev. of Abnormal T2 [%] |
|------------------------|-------------|---------|--------------------|---------------------|-----------|----------------|-------------------------------|------------------|-------------------------------|-------------------------------------------------|-----------------------------------------------|----------------------------------|----------------------------------------------|----------------|---------------------------|--------------------------|---------------------------|--------------------------|
| Joy <sup>75</sup>      | 33975819    | 74      | 37                 | 6m                  | 1.5T      |                | visual and quantitative (3SD) |                  |                               |                                                 | MOLLI<br>Pre: 5s[3s];<br>Post: 4s[1s]3s[1s]2s | septal/global T1 > 1072          | 7%                                           | ND (ECV ~ 22%) | 4%                        | ND                       | Septal/global T2 > 52.4   | ~8%                      |
| Knight <sup>79</sup>   | 32673505    | 29      | 64                 | 37d                 | 1.5T      | ND             | visual                        | ~60%             | ND                            | ~50%                                            | ND                                            | ND                               | ND                                           | ND             | ND                        | ND                       | ND                        | ND                       |
| Kotecha <sup>49</sup>  | 33596594    | 148     | 64                 | 68d                 | 1.5T      | PSIR FLASH     | visual                        | 49%              | 16%                           | 10%                                             | MOLLI<br>5s(3s)3s                             | septal ROI > 1076                | ~13%                                         | ND             | ND                        | T2-prep single-shot SSFP | septal ROI T2 > 52        | ~3%                      |
| Li <sup>78</sup>       | 33434112    | 40      | 54                 | 158 d               | 3T        | PSIR GRE       | visual                        | 1%               | ND                            | ND                                              | MOLLI<br>Pre: 5(3)3;<br>Post: 4(1)3(1)2       | ND                               | ND                                           | ND (ECV ~ 30%) | ND                        | ND                       | ND                        | ND                       |
| Luetkens <sup>85</sup> | 33969316    | 8       | 8                  | 8d                  | 1.5T      | ND             | visual                        | 38%              | ND                            | ND                                              | ND                                            | ND                               | ND (T1 = 1044 ± 32 vs. 953 ± 32 ms; P<0.001) | ND             | ND                        | ND                       | ND                        | 13%                      |
| Ng <sup>80</sup>       | 33153536    | 16      | 68                 | 56d                 | 1.5T      | ND             | visual                        | 25%              | 19%                           | 6%                                              | SMART1 (saturation-prepared)                  | global T1 > 1208                 | 25%                                          | ND             | ND                        | ND                       | global T2 > 54.8          | 5%                       |
| Puntman <sup>35</sup>  | 32730619    | 100     | 49                 | 56d                 | 3T        | ND             | visual                        | 32%              |                               | 20%                                             | MOLLI (scheme ND)                             | ND                               | 73%                                          | ND             | ND                        | T2-FLASH                 | ND                        | 60%                      |

**SUPPLEMENTAL MATERIAL**

| First Author (Year)          | Pubmed PMID | N cases | Median or Mean Age | Post Covid Interval | CMR Tesla | LGE Pulse Seq. | LGE Analysis                   | Prev. of LGE [%] | Prev. of Ischemic Pattern LGE | Prev. of Non-Ischemic & Pericardial Pattern LGE | T1 Mapping Pulse Seq.                              | Location & native T1 Cutoff [ms]                 | Prev. of Abnormal Native T1 [%]                        | ECV Cutoff [%] | Prev. of Abnormal ECV [%] | T2 Pulse Seq.            | Location & T2 Cutoff [ms]              | Prev. of Abnormal T2 [%] |
|------------------------------|-------------|---------|--------------------|---------------------|-----------|----------------|--------------------------------|------------------|-------------------------------|-------------------------------------------------|----------------------------------------------------|--------------------------------------------------|--------------------------------------------------------|----------------|---------------------------|--------------------------|----------------------------------------|--------------------------|
| Raman <sup>76</sup>          | 33490928    | 58      | 55                 | 2.3m                | 3T        | PSIR FLASH     | visual and quantitative (SSD)  |                  |                               |                                                 | shMOLLI                                            | basal T1 > 1197; mid T1 > 1215; apical T1 > 1275 | 26%                                                    | ND (ECV ~ 30%) | ND                        | T2-prep single-shot SSFP | basal & mid LV T2 > 46; apical T2 > 51 | 2-6%                     |
| Urmeneta Ulloa <sup>83</sup> | 34368419    | 57      | 59                 | 81d                 | 1.5T      | ND             | ND                             | 26%              | 3.50%                         | 22.80%                                          | MOLLI 3(3)5 scheme                                 | ND                                               | ND (T1=996.4 ± 43.9 ms; n.s. difference with controls) | ND             | 19%                       | T2-prep TSE              | ND (50.9 ± 4.3 vs. 48 ± 1.9; p<0.01)   | ND                       |
| Wang <sup>77</sup>           | 33627143    | 44      | 48                 | 103d                | 3T        | PSIR TFE       | visual and quantitative (FWHM) | 29.50%           | 0%                            | 29.50%                                          | MOLLI (scheme ND; same for pre- and post-contrast) | ND                                               | ND                                                     | ND             | ND                        | ND                       | ND                                     | ND                       |
| Webster <sup>82</sup>        | 34193197    | 17      | 14                 | 72d                 | 1.5T      | ND             | visual                         | ND               | ND                            | ND                                              | ND                                                 | ND                                               | ND (T1= 973 ms; n.s. difference with controls)         | ND             | ND                        | ND                       | ND                                     | ND                       |
| Wojtowic <sup>81</sup>       | 34708861    | 50      | 47                 | 52d                 | 1.5T      | ND             | visual                         | 60%              | ND                            | ND                                              | ND                                                 | ND                                               | 2%                                                     | ND             | ND                        | ND                       | ND                                     | ND                       |
| Brito <sup>51</sup>          | 33223496    | 54      | 19                 | 27d                 | 1.5T      | ND             | visual                         | 56%              | ND                            | ND                                              | ShMOLLI 5(1)3(1)1                                  | T1 >= 990                                        | 19%                                                    | ND             | ND                        | ND                       | T2 > 52                                | 0%                       |
| Clark <sup>54</sup>          | 33332151    | 59      | 20                 | 22d                 | 1.5T      | ND             | visual                         | 27%              | ND                            | ND                                              | ND                                                 | ND                                               | ND                                                     | ND             | ND (mean ECV 22.9 ± 2 %)  | ND                       | ND                                     | ND                       |

**SUPPLEMENTAL MATERIAL**

| First Author (Year)    | Pubmed PMID | N cases | Median or Mean Age | Post Covid Interval | CMR Tesla | LGE Pulse Seq. | LGE Analysis | Prev. of LGE [%] | Prev. of Ischemic Pattern LGE | Prev. of Non-Ischemic & Pericardial Pattern LGE | T1 Mapping Pulse Seq.        | Location & native T1 Cutoff [ms] | Prev. of Abnormal Native T1 [%]       | ECV Cutoff [%] | Prev. of Abnormal ECV [%] | T2 Pulse Seq. | Location & T2 Cutoff [ms]                | Prev. of Abnormal T2 [%]         |
|------------------------|-------------|---------|--------------------|---------------------|-----------|----------------|--------------|------------------|-------------------------------|-------------------------------------------------|------------------------------|----------------------------------|---------------------------------------|----------------|---------------------------|---------------|------------------------------------------|----------------------------------|
| Malek <sup>57</sup>    | 33474768    | 26      | 24                 | 32d                 | 1.5T      | PSIR GRE       | visual       | 4%               | 0%                            | 4%                                              | MOLLI                        | T1 > 1054                        | 0%                                    | > 31.9%        | 0%                        | T2-prep SSFP  | > 50                                     | 4%                               |
| Rajpal <sup>52</sup>   | 32915194    | 26      | 19.5               | 23d                 | 1.5T      | ND             | visual       | 46%              | 0%                            | 46%                                             | ND                           | T1 > 999                         | 31%                                   | 29%            | 4%                        | ND            | Max. segmental T2 >= 53                  | 50%                              |
| Starekov <sup>53</sup> | 33443537    | 145     | 20                 | 15d                 | 1.5 & 3T  | PSIR GRE       | visual       | 29%              |                               | 28%                                             | MOLLI                        | ND                               | ND (1.5T: 978 ± 40; 3T: 1128 ± 84 ms) | ND             | ND                        | ND            | ND                                       | ND (1.5T: 48 ± 4; 3T: 49 ± 5 ms) |
| Szábo <sup>61</sup>    | 34848398    | 147     | 23                 | 32d                 | 1.5T      | IR TFE         | visual       | 2%               | 0%                            | 2%                                              | MOLLI 5(3)3 for pre and post | ND                               | ND (T1=958 ms)                        | ND             | ND                        | T2-prep SSFP  | ND (T2=45; n.s. difference vs. controls) | ND                               |

**Table S1.**

Prev. = prevalence

Pulse Seq. = pulse sequence

ND = Not Defined

NS = Not specified

Grey shading = Athletic Cohorts
